# Supplementary material
Source: MDPI journal article supplement (https://www.mdpi.com/2073-4344/9/10/843)
Supplement: s1 [file s1]

# Supplementary Materials

## Developing a novel enzyme immobilization process by activation of epoxy carriers with glucosamine for pharmaceutical and food applications

Immacolata Serra <sup>1</sup>, Ilaria Benucci <sup>2</sup>, Marina Simona Robescu <sup>3</sup>, Claudio Lombardelli <sup>2</sup>, Marco Esti <sup>2</sup>, Cinzia Calvio <sup>4</sup>, Massimo Pregnolato <sup>3</sup>, Marco Terreni <sup>3</sup>, Teodora Bavaro <sup>3,\*</sup>

<sup>1</sup> Department of Food, Environmental and Nutritional Sciences, University of Milan, Via Mangiagalli 25, I-20133 Milano, Italy; [immacolata.serra@unimi.it](mailto:immacolata.serra@unimi.it) (I.S.)

<sup>2</sup> Department of Agriculture and Forestry Science (DAFNE), University of Tuscia, Via S. Camillo de Lellis snc, 01100 Viterbo, Italy; [ilaria.be@unitus.it](mailto:ilaria.be@unitus.it) (I.B.), [claudiolomb@hotmail.it](mailto:claudiolomb@hotmail.it) (C.L.), [esti@unitus.it](mailto:esti@unitus.it) (M.E.)

<sup>3</sup> Department of Drug Sciences, University of Pavia, Viale Taramelli 12, I-27100 Pavia, Italy; [marinasimona.robescu@unipv.it](mailto:marinasimona.robescu@unipv.it) (M.S.R.), [massimo.pregnolato@unipv.it](mailto:massimo.pregnolato@unipv.it) (M.P.), [marco.terreni@unipv.it](mailto:marco.terreni@unipv.it) (M.T.), [teodora.bavaro@unipv.it](mailto:teodora.bavaro@unipv.it) (T.B.)

<sup>4</sup> Department of Biology and Biotechnology Lazzaro Spallanzani, University of Pavia, Via Ferrata 9, I-27100 Pavia, Italy; [cinzia.calvio@unipv.it](mailto:cinzia.calvio@unipv.it) (C.C.)

\* Correspondence: [teodora.bavaro@unipv.it](mailto:teodora.bavaro@unipv.it) (T.B.); Tel.: +39-0382-987889

## Table of contents

**Figure S1:** Stability of soluble and immobilized PGA

**Figure S2:** Synthesis of Cefazolin (**2a**) catalyzed by recycled PGA immobilized on Relizyme EP403/S-glucosamine

**Figure S3:** Stability of soluble bromelain at pH 10 and 4 °C

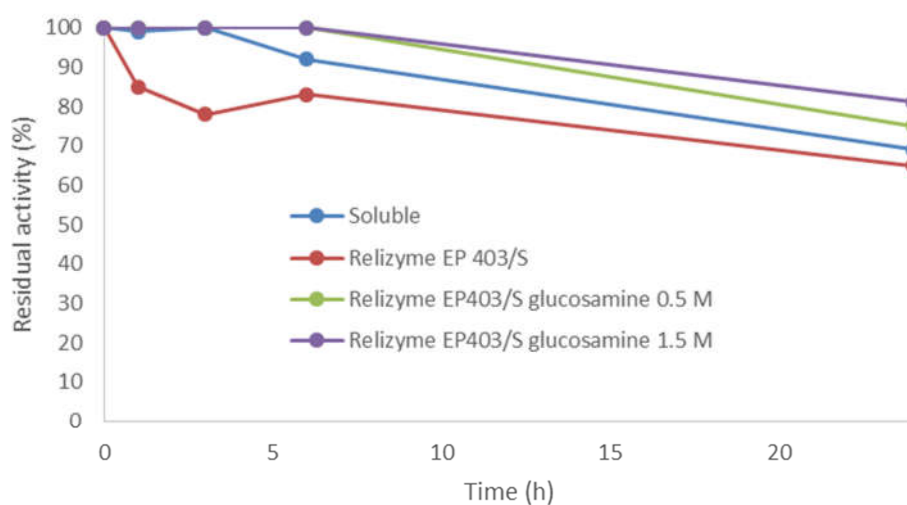

**Figure S1:** Stability of soluble and immobilized PGA under operational conditions, such as MeOH 40%, room temperature and pH 6.5.

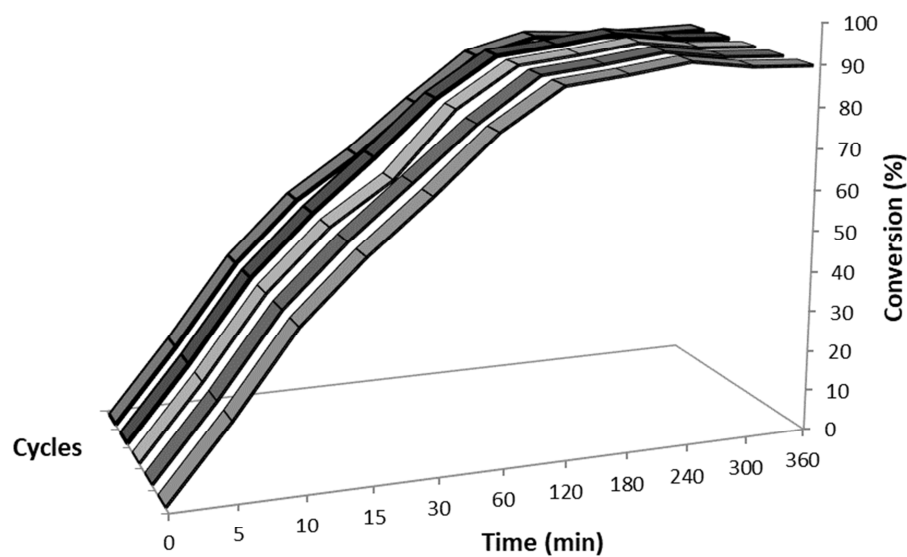

**Figure S2:** Synthesis of Cefazolin (**2a**) catalyzed by recycled PGA immobilized on Relizyme EP403/S-glucosamine.

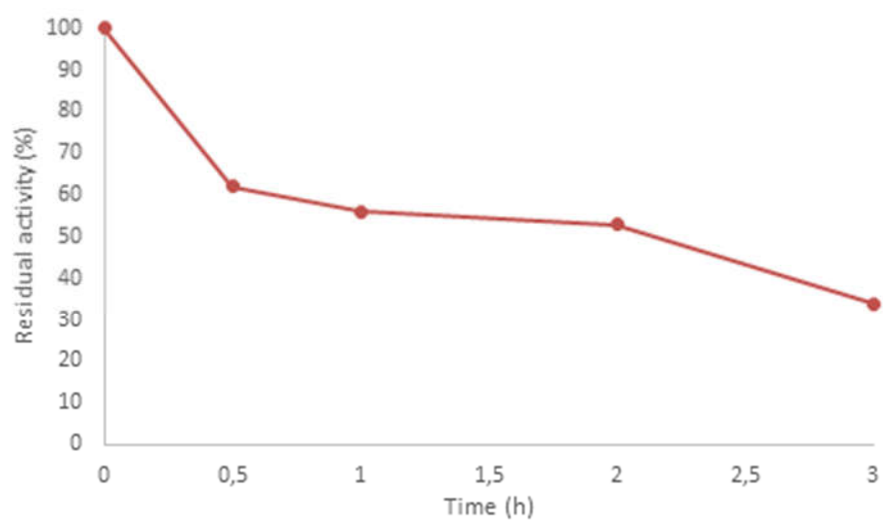

**Figure S3:** Stability of soluble bromelain at pH 10 (50 mM carbonate buffer) over 3 hours at 4 °C.
